# Supplementary material for: Endothelial HIFα/PDGF-B to smooth muscle Beclin1 signaling sustains pathological muscularization in pulmonary hypertension
Source: JCI journal article supplement (doi:10.1172/jci.insight.162449), 2024-04-23

Full unedited blots for Figure 2B

HIF1- $\alpha$

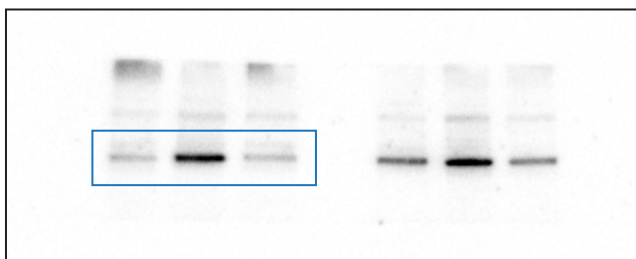

HIF2- $\alpha$

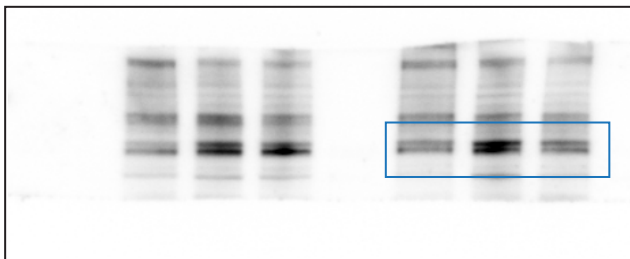

GAPDH

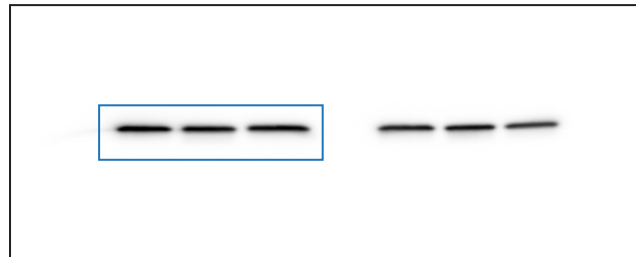

GAPDH

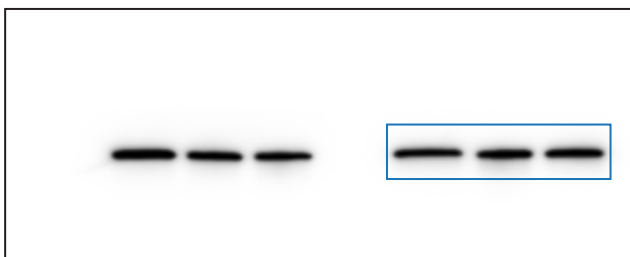

Full unedited blots for Figure 2F

HIF1- $\alpha$

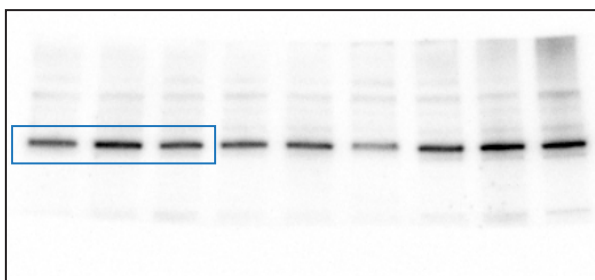

HIF2- $\alpha$

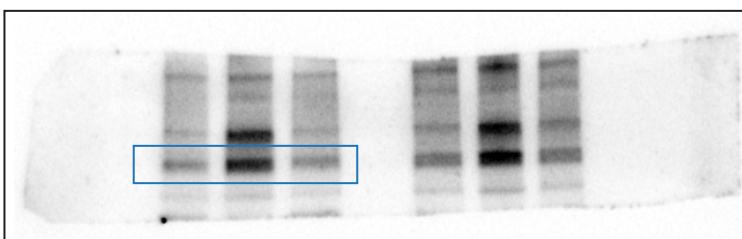

GAPDH

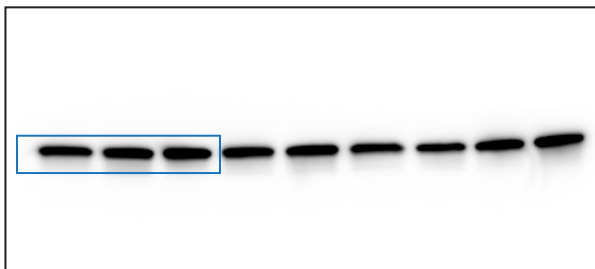

GAPDH

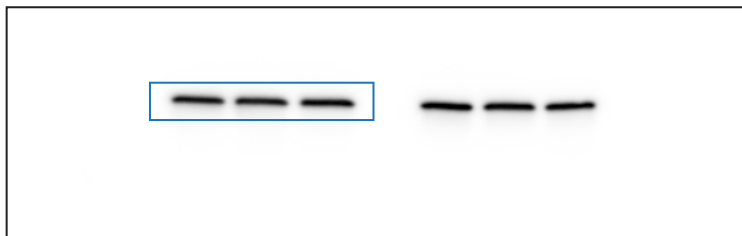

# Full unedited blots for Figure 7B

Beclin1

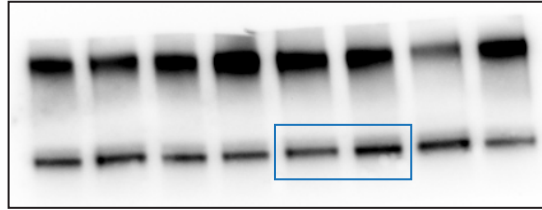

GAPDH

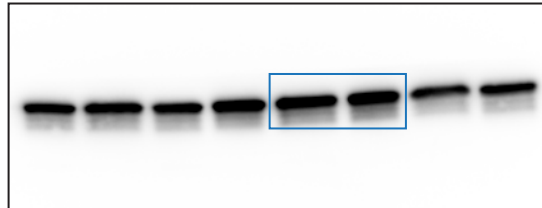

LC3B

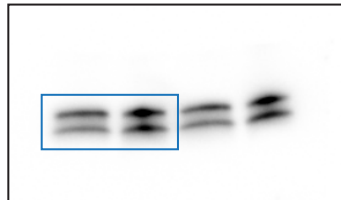

GAPDH

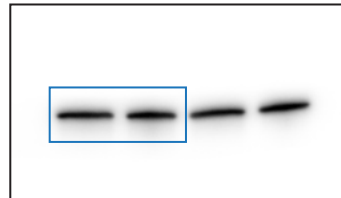

P62

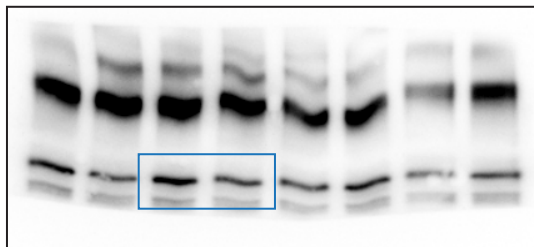

GAPDH

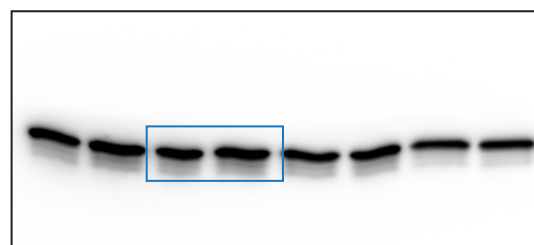

Full unedited blots for Figure S4D

HIF1- $\alpha$

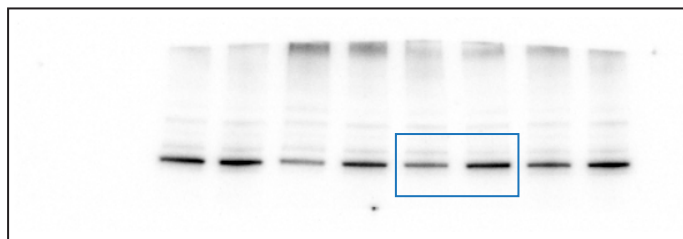

GAPDH

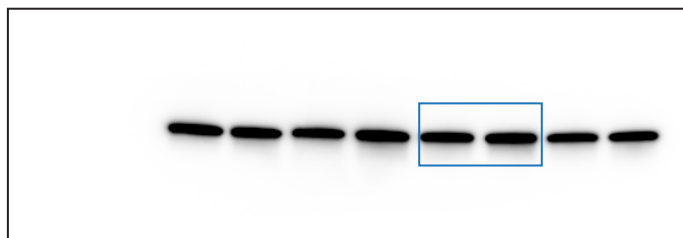

Full unedited blots for Figure S5B

VHL

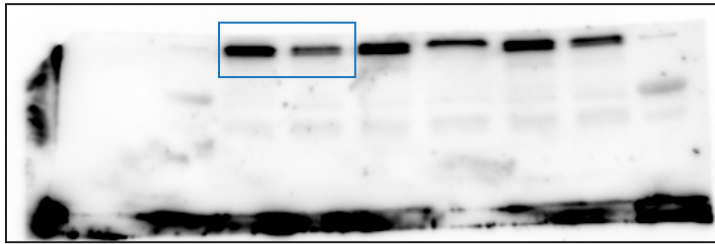

GAPDH

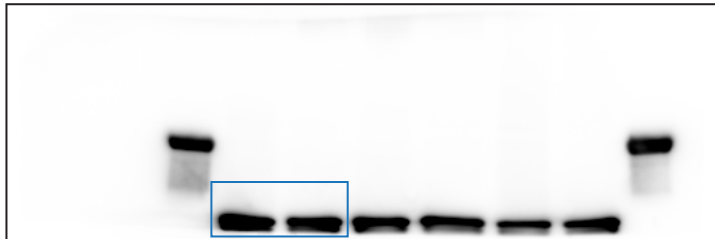

HIF1- $\alpha$

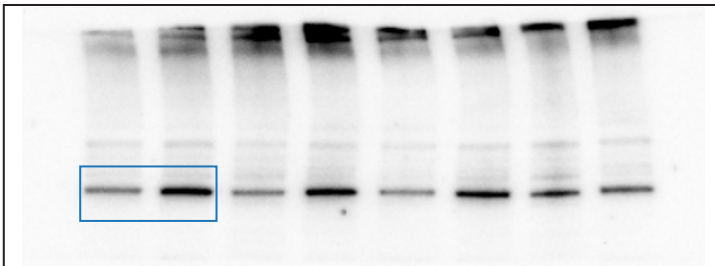

GAPDH

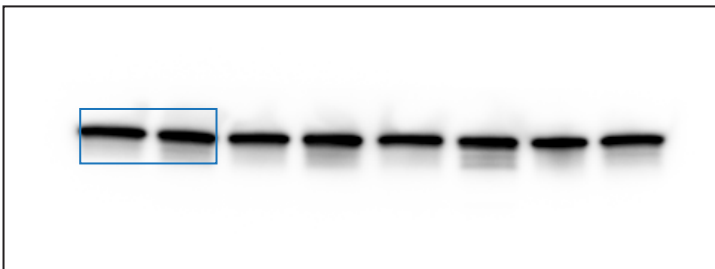

HIF2- $\alpha$

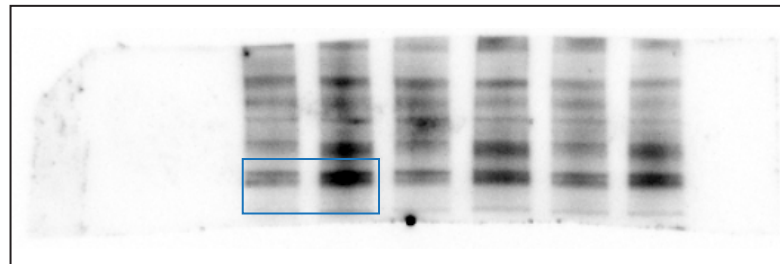

GAPDH

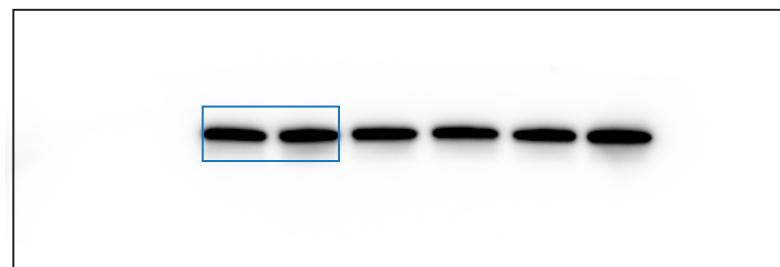

### Full unedited blots for Figure S7B

HIF1- $\alpha$

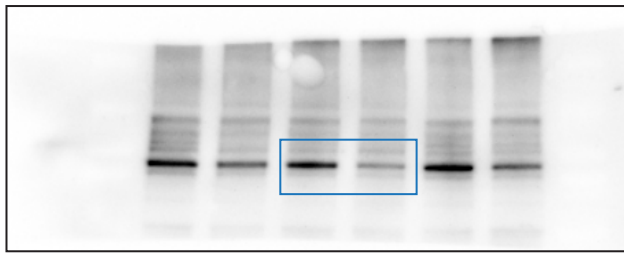

GAPDH

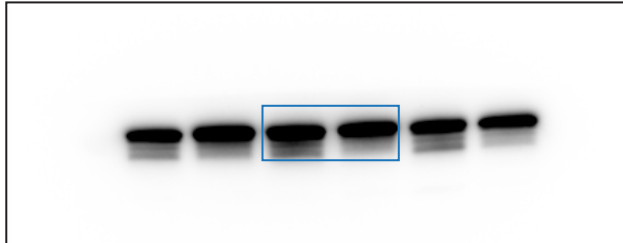

### Full unedited blots for Figure S7D

HIF2- $\alpha$

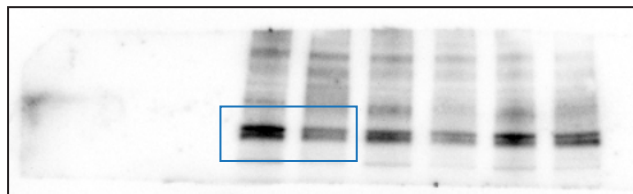

GAPDH

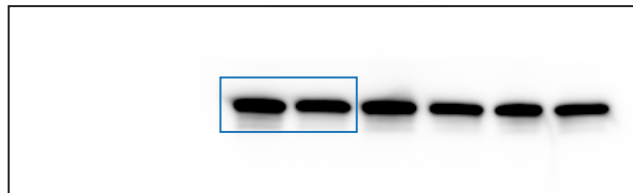

Full unedited blots for Figure S13C

Beclin1

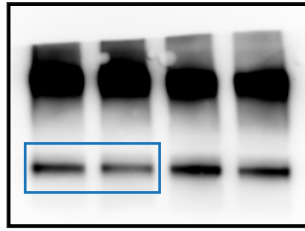

GAPDH

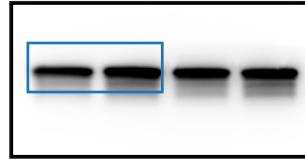

Supplement: sd2 [file 2]
